# Supplementary material for: Removal of Methylene Blue Dye from Aqueous Solutions Using Polymer Inclusion Membrane Containing Calix[4]pyrrole
Source: MDPI journal article supplement (doi:10.3390/membranes14040092), 2024-04-17

# The NMR spectra

Probka nr 1

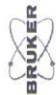

Current Data Parameters  
NAME 6285  
EXPNO 1  
PROCNO 1

F2 - Acquisition Parameters  
Date\_ 20220919  
Time 11:29  
INSTRUM spect  
PROBHD 5 mm PABBO BB  
PULPROG zgpg30  
TD 65536  
SOLVENT CDCl3  
NS 402  
DS 2  
SWH 12019.330 Hz  
FIDRES 0.163399 Hz  
AQ 2.7262976 sec  
RG 135.62  
DW 41.600 usec  
DE 6.50 usec  
TE 295.2 K  
D1 1.00000000 sec  
TD0 1

===== CHANNEL f1 =====  
SFO1 400.1324710 MHz  
NUC1 1H  
P1 15.00 usec  
PLW1 10.50000000 W

F2 - Processing parameters  
SI 65536  
SF 400.1300377 MHz  
WDW EM  
SSB 0  
LB 0.30 Hz  
GB 0  
FC 1.00

7.5277  
7.4639  
7.1894  
6.9043  
6.8822  
6.6970  
6.6749  
5.8540  
5.8475  
5.6669  
5.6604  
4.5185  
4.2212  
4.2034  
4.1856  
4.1678  
3.5124  
3.4949  
3.4773  
3.4598  
1.7864  
1.3305  
1.2423  
1.2246  
1.2067  
1.1821  
1.1023  
1.0848  
1.0672

Tekst

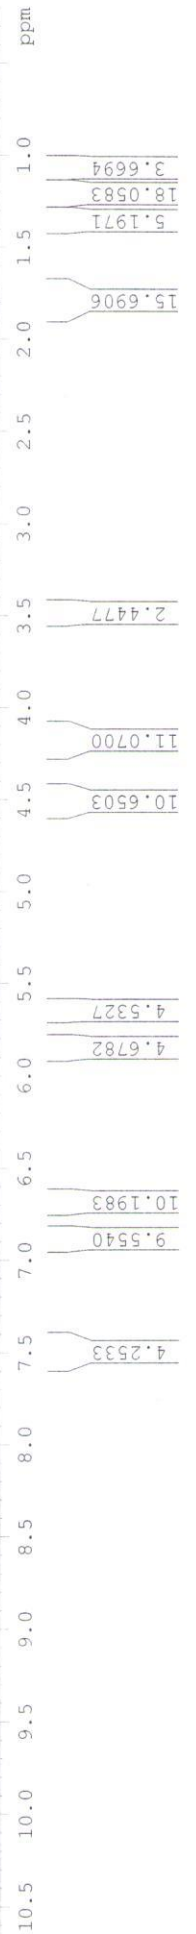

Probka nr 1

1.3305  
1.2423  
1.2246  
1.2067  
1.1821  
1.1023  
1.0848  
-1.0672

1.7864

-3.5124  
3.4949  
3.4773  
-3.4598

-4.2212  
4.2034  
4.1856  
-4.1678

4.5185

ppm

0.5

1.0

1.5

2.0

2.5

3.0

3.5

4.0

4.5

3.6694

18.0583

5.1971

15.6906

2.4477

11.0700

10.6503

5.6604

5.6669

5.8475

5.8540

6.6749

6.6970

6.8822

6.9043

7.1894

7.4639

7.5277

ppm

5.5

6.0

6.5

7.0

7.5

8.0

4.5327

4.6782

10.1983

9.5540

4.2533

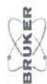

Probka nr 1\_13C

Current Data Parameters  
NAME 6285  
EXPNO 2  
PROCNO 1

F2 - Acquisition Parameters

Date\_ 20220919  
Time\_ 14.21  
INSTRUM spect  
PROBHD 5 mm F400 BB/  
PULPROG zgpg30  
TD 65536  
SOLVENT CDCl3  
NS 25100  
DS 4  
SWH 29761.904 Hz  
FIDRES 0.454131 Hz  
AQ 1.1010048 sec  
RG 2050  
DM 16.800 usec  
DE 6.50 usec  
TE 296.0 K  
D1 2.00000000 sec  
D11 0.03000000 sec  
TD0 1

===== CHANNEL f1 =====  
SFO1 100.6228293 MHz  
NUC1 13C  
P1 10.00 usec  
PLH1 50.00000000 W

===== CHANNEL f2 =====  
SFO2 400.1316005 MHz  
NUC2 1H  
P2 90.00 usec  
PLH2 10.50000000 W  
PLH3 0.23625000 W

F2 - Processing parameters

SI 32768  
SF 100.6127685 MHz  
WDW EM  
SSB 0  
LB 1.00 Hz  
GB 0  
PC 1.40

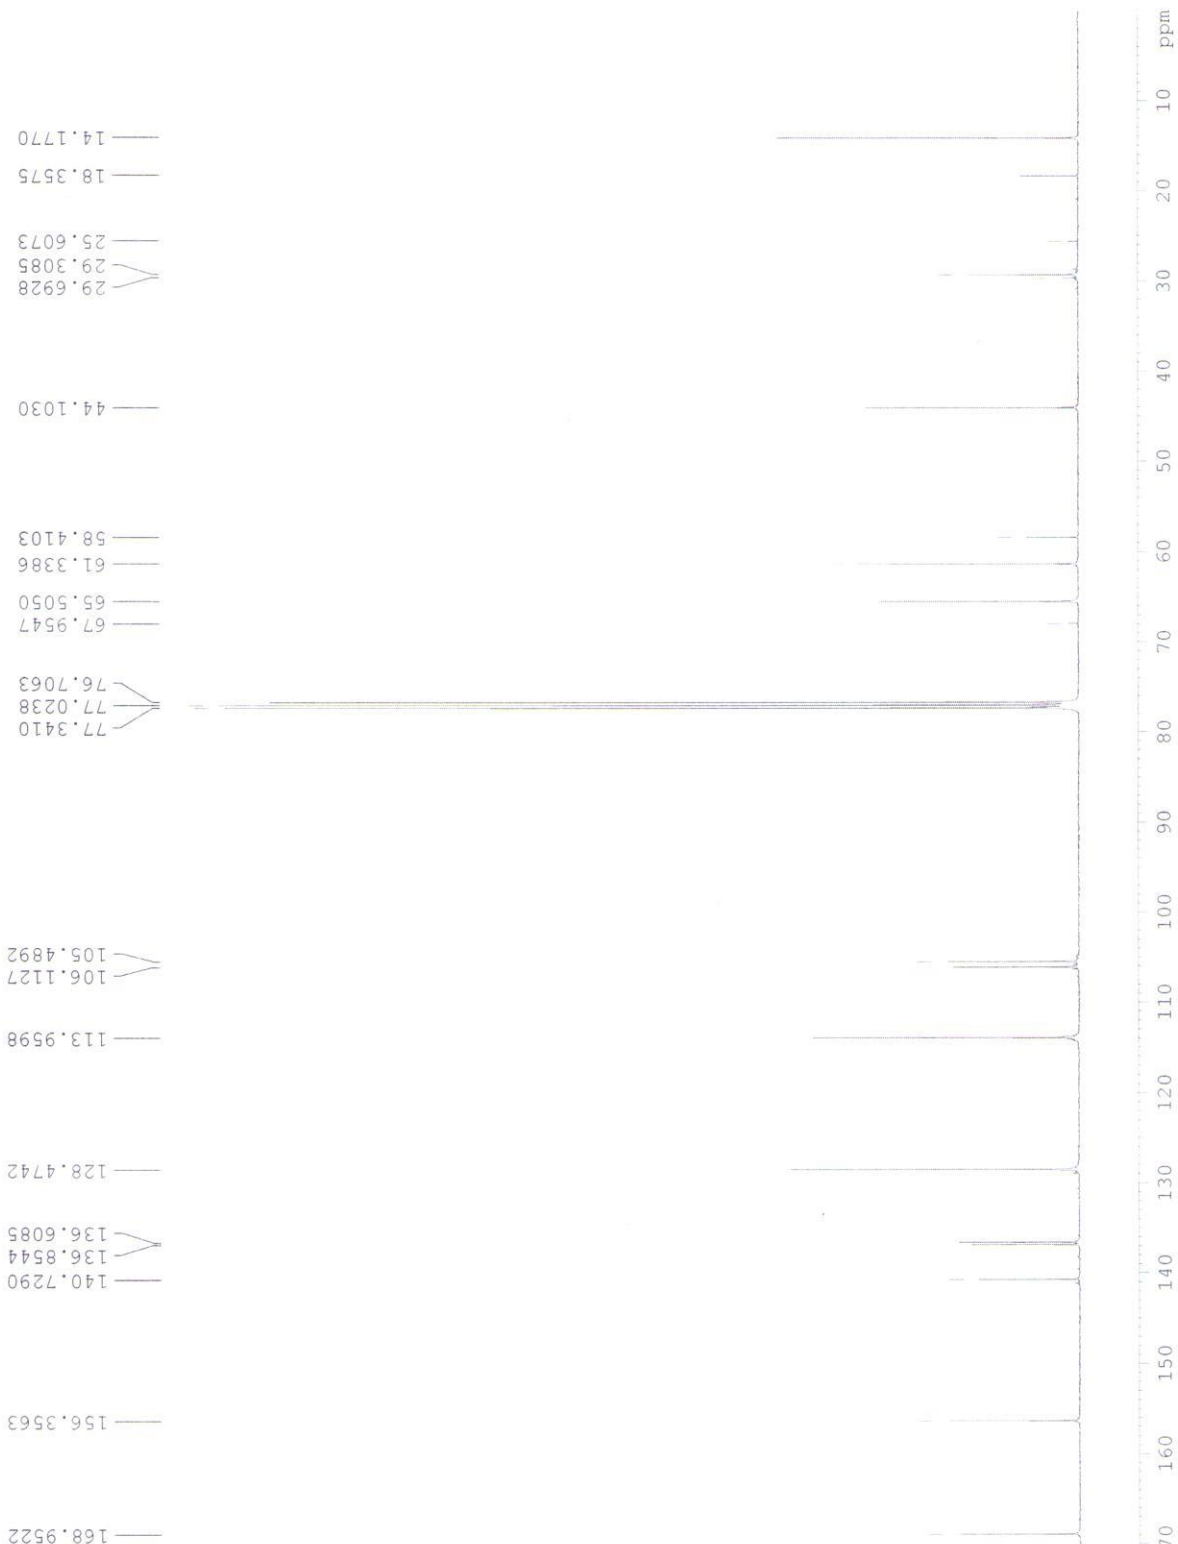

Supplement: s1 [file s1]
